# Supplementary material for: Post-Marketing Safety Surveillance of Tofacitinib over 9 Years in Patients with Psoriatic Arthritis and Rheumatoid Arthritis
Source: PubMed Central journal article supplement — Rheumatol Ther. 2023 Jul 17;10(5):1255–76. doi: 10.1007/s40744-023-00576-8 (PMC10469130; doi:10.1007/s40744-023-00576-8), 2023-07-17
Supplement: 40744_2023_576_MOESM1_ESM.pdf [file 40744_2023_576_MOESM1_ESM.pdf]

## **SUPPLEMENTARY MATERIAL**

### **Post-Marketing Safety Surveillance of Tofacitinib over 9 Years in Patients with Psoriatic Arthritis and Rheumatoid Arthritis**

Gerd R. Burmester • Laura C. Coates • Stanley B. Cohen • Yoshiya Tanaka • Ivana Vranic • Edward Nagy • Irina Lazariciu • All-shine Chen • Kenneth Kwok • Lara Fallon • Cassandra Kinch

G. R. Burmester

Department of Rheumatology and Clinical Immunology, Charité-Universitätsmedizin Berlin, Berlin, Germany

L. C. Coates

Nuffield Department of Orthopaedics, Rheumatology and Musculoskeletal Sciences, University of Oxford, Botnar Research Centre, Oxford, UK

S. B. Cohen

Metroplex Clinical Research Center and Department of Internal Medicine, The University of Texas Southwestern Medical Center, Dallas, TX, USA

Y. Tanaka

First Department of Internal Medicine, University of Occupational and Environmental Health, Japan, Kitakyushu, Japan

I. Vranic • E. Nagy

Pfizer Ltd, Tadworth, UK

I. Lazariciu • K. Kwok

Pfizer Inc, New York, NY, USA

A.-s. Chen

Pfizer Inc, Groton, CT, USA

L. Fallon • C. Kinch (corresponding author)

Inflammation & Immunology, Pfizer Canada ULC, 17300 Trans-Canada Hwy, Kirkland, QC H9J 2M5, Canada

e-mail: [cassandra.kinch@pfizer.com](mailto:cassandra.kinch@pfizer.com)

## Supplementary Methods

### Search Criteria for AESIs

| AESI                                                             | MedDRA/SMQ level  <br>MedDRA term(s)/SMQ (MedDRA version 24.1)                                                                                                                                                                                                                                                                                                                                                                                                                                                                                                                 |
|------------------------------------------------------------------|--------------------------------------------------------------------------------------------------------------------------------------------------------------------------------------------------------------------------------------------------------------------------------------------------------------------------------------------------------------------------------------------------------------------------------------------------------------------------------------------------------------------------------------------------------------------------------|
| Venous thromboembolism (deep vein thrombosis/pulmonary embolism) | SMQ Narrow   Embolic and thrombotic events, venous                                                                                                                                                                                                                                                                                                                                                                                                                                                                                                                             |
| Serious and other important infections                           | (Adverse events that met serious criteria only)<br>SOC   Infections and infestations [Primary path]<br>PT   Febrile neutropenia                                                                                                                                                                                                                                                                                                                                                                                                                                                |
| Herpes zoster reactivation                                       | PT   Disseminated varicella zoster virus infection<br>PT   Genital herpes zoster<br>PT   Herpes zoster<br>PT   Herpes zoster cutaneous disseminated<br>PT   Herpes zoster disseminated<br>PT   Herpes zoster infection neurological<br>PT   Herpes zoster meningitis<br>PT   Herpes zoster meningoencephalitis<br>PT   Herpes zoster meningomyelitis<br>PT   Herpes zoster meningoradiculitis<br>PT   Herpes zoster necrotising retinopathy<br>PT   Herpes zoster oticus<br>PT   Herpes zoster pharyngitis<br>PT   Herpes zoster reactivation<br>PT   Ophthalmic herpes zoster |
| Non-melanoma skin cancer                                         | HLT   Skin neoplasms malignant and unspecified (excluding melanoma) (primary path)<br>PT   Squamous cell carcinoma                                                                                                                                                                                                                                                                                                                                                                                                                                                             |

|                                                                                 |                                                                                                                                                                                                                                                             |
|---------------------------------------------------------------------------------|-------------------------------------------------------------------------------------------------------------------------------------------------------------------------------------------------------------------------------------------------------------|
| Malignancy (terms covered under non-melanoma skin cancer are not included here) | SMQ Narrow   Malignancy related conditions<br>SMQ Narrow   Malignancy related therapeutic and diagnostic procedures<br>SMQ Narrow   Malignant or unspecified tumours<br>SMQ Narrow   Tumour markers                                                         |
| Cardiovascular events                                                           | SMQ Narrow   Central nervous system vascular disorders<br>SMQ Narrow   Myocardial infarction<br>SMQ Narrow   Other ischaemic heart disease<br>PT   Cardiac death<br>PT   Cardiac failure congestive<br>PT   Sudden cardiac death<br>PT   Pulmonary embolism |
| All-cause mortality                                                             | Clinical outcome = Fatal                                                                                                                                                                                                                                    |

*AESI* adverse event of special interest, *HLT* High Level Term, *MedDRA* Medical Dictionary for Regulatory Activities, *PT* Preferred Term, *SMQ* Standardised MedDRA Query, *SOC* System Organ Class

**Fig. S1** Most frequent AEs occurring in  $\geq 2\%$  of patients with PsA and RA (tofacitinib formulation not reported). Percentages were calculated from the total case reports with no tofacitinib formulation reported. *AE* adverse event, *COVID-19* Coronavirus disease 2019, *HZ* herpes zoster, *PsA* psoriatic arthritis, *RA* rheumatoid arthritis

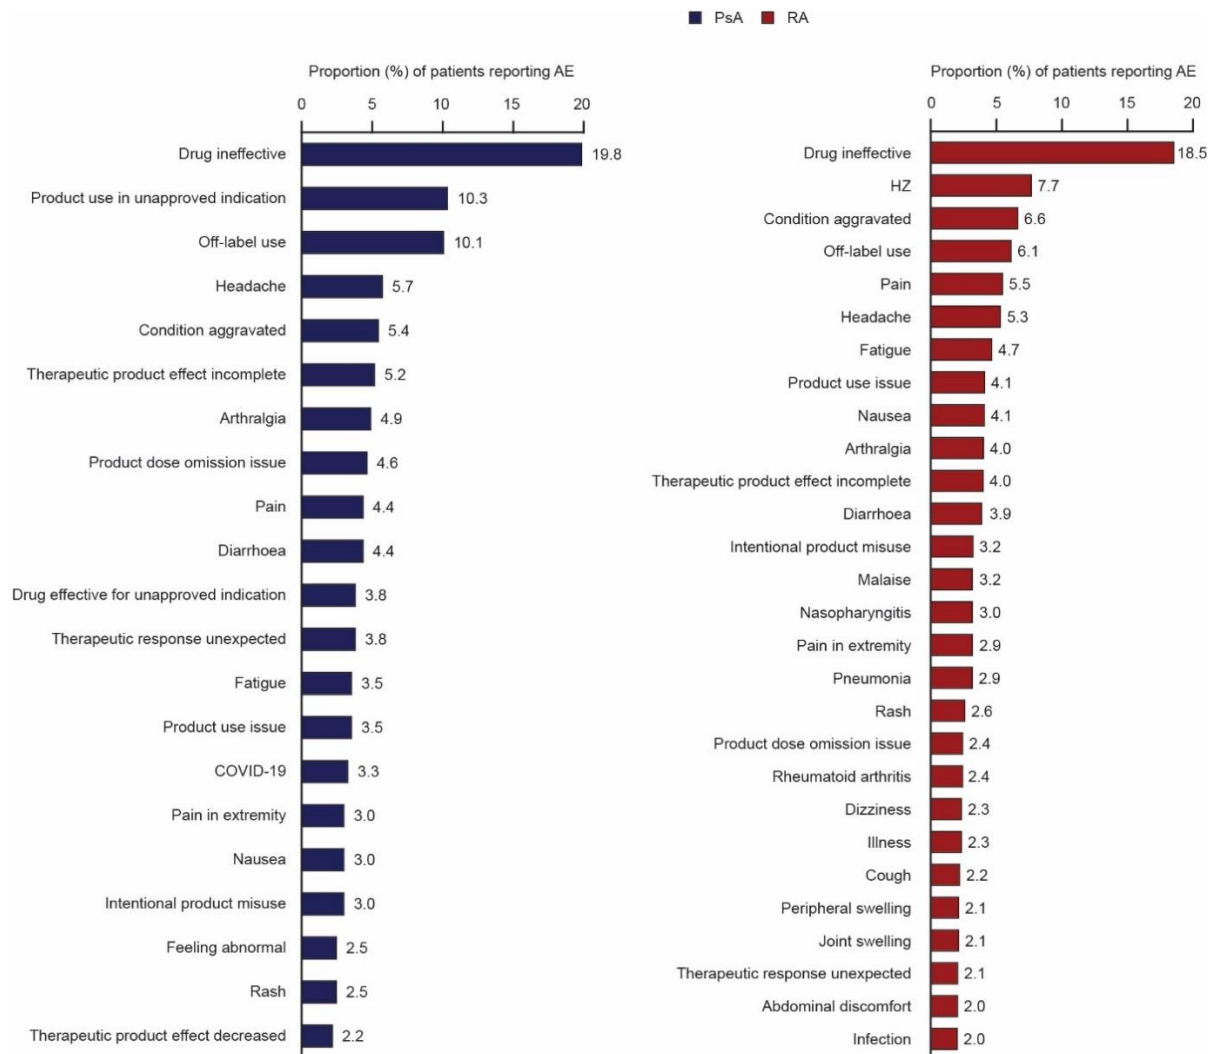

**Table S1** Patient characteristics among patients with PsA and RA (tofacitinib formulation not reported)

|                                | <b>Tofacitinib formulation not reported</b> |                          |             |                          |
|--------------------------------|---------------------------------------------|--------------------------|-------------|--------------------------|
|                                | <b>PsA</b>                                  |                          | <b>RA</b>   |                          |
|                                | <i>N</i>                                    | <b>% of case reports</b> | <i>N</i>    | <b>% of case reports</b> |
| Case reports                   | 368                                         |                          | 4239        |                          |
| Sex                            |                                             |                          |             |                          |
| Male                           | 94                                          | 25.5                     | 638         | 15.1                     |
| Female                         | 197                                         | 53.5                     | 2778        | 65.5                     |
| Not reported                   | 77                                          | 20.9                     | 823         | 19.4                     |
| Age                            |                                             |                          |             |                          |
| Median (SD) [range], years     | 57.0 (12.83)                                |                          | 61.0 (13.3) |                          |
|                                | [12.0–86.0]                                 |                          | [2.58–96.0] |                          |
| < 65 years                     | 158                                         | 42.9                     | 1700        | 40.1                     |
| ≥ 65 years                     | 67                                          | 18.2                     | 1176        | 27.7                     |
| Not reported                   | 143                                         | 38.9                     | 1363        | 32.2                     |
| Geographical region            |                                             |                          |             |                          |
| North America <sup>a</sup>     | 222                                         | 60.3                     | 2129        | 50.2                     |
| Europe <sup>b</sup>            | 84                                          | 22.8                     | 532         | 12.6                     |
| Rest of the world <sup>c</sup> | 62                                          | 16.8                     | 1579        | 37.2                     |

*PsA* psoriatic arthritis, *RA* rheumatoid arthritis, *SD* standard deviation

<sup>a</sup>Includes case reports from Canada, Puerto Rico and the US

<sup>b</sup>Includes case reports from Austria, Belgium, Bulgaria, Croatia, Czech Republic, Denmark, Finland, France, Germany, Greece, Hungary, Ireland, Israel, Italy, Luxembourg, Netherlands, Norway, Poland, Portugal, Romania, Serbia, Slovakia, Slovenia, Spain, Sweden, Switzerland, Turkey and the UK

<sup>c</sup>Includes case reports from Argentina, Australia, Brazil, Chile, China, Colombia, Ecuador, Egypt, Hong Kong, India, Japan, Korea, Kuwait, Lebanon, Malaysia, Mexico, Morocco, New Zealand, Peru, Philippines, Saudi Arabia, Singapore, South Africa, Thailand, Tunisia and the United Arab Emirates

**Table S2** Safety outcomes among patients with PsA and RA (tofacitinib formulation not reported)

|                                    | <b>Tofacitinib formulation not reported</b> |                   |           |                   |
|------------------------------------|---------------------------------------------|-------------------|-----------|-------------------|
|                                    | <b>PsA</b>                                  |                   | <b>RA</b> |                   |
|                                    | <i>N</i>                                    | % <sup>a</sup>    | <i>N</i>  | % <sup>a</sup>    |
| Case reports                       | 368                                         |                   | 4239      |                   |
| AEs                                | 905                                         |                   | 12,216    |                   |
| SAEs                               | 134                                         | 14.81             | 3163      | 25.89             |
| AESI <sup>b</sup>                  |                                             |                   |           |                   |
| Serious infections                 | 29                                          | 3.20              | 582       | 4.76              |
| HZ (serious and nonserious)        | 7                                           | 0.77              | 340       | 2.78              |
| Cardiovascular events <sup>c</sup> | 9                                           | 0.99              | 130       | 1.06              |
| Malignancies (excluding NMSC)      | 2                                           | 0.22              | 195       | 1.60              |
| NMSC                               | 2                                           | 0.22              | 23        | 0.19              |
| VTE <sup>d</sup>                   | 8                                           | 0.88              | 81        | 0.66              |
| Fatal cases                        | 1                                           | 0.27 <sup>e</sup> | 78        | 1.84 <sup>e</sup> |

*AE* adverse event, *AESI* adverse event of special interest, *BID* twice daily, *HZ* herpes zoster, *MedDRA* Medical Dictionary for Regulatory Activities, *NMSC* nonmelanoma skin cancer, *PsA* psoriatic arthritis, *PT* Preferred Term, *RA* rheumatoid arthritis, *SAE* serious adverse event, *VTE* venous thromboembolism

<sup>a</sup>Percentages are based on total AEs by indication except where otherwise indicated

<sup>b</sup>Search criteria for AESI categories are described in the Supplementary Methods

<sup>c</sup>Includes the following Standardised MedDRA Queries: central nervous system vascular disorders, myocardial infarction and associated terms, ischaemic heart disease and associated terms; and the following PTs: cardiac death, cardiac failure congestive, sudden cardiac death and pulmonary embolism

<sup>d</sup>Pulmonary embolism events are captured in the cardiovascular events and VTE categories

<sup>e</sup>Percentages are based on the total case reports by indication

**Table S3** Safety outcomes by tofacitinib formulation in the first 4 years post-approval among patients with RA

|                                    | November 2012 to November 2016 |                   |                 |                           |                   |                 |                              |                   |                 |
|------------------------------------|--------------------------------|-------------------|-----------------|---------------------------|-------------------|-----------------|------------------------------|-------------------|-----------------|
|                                    | Tofacitinib IR<br>49,439 PY    |                   |                 | Tofacitinib MR<br>2000 PY |                   |                 | All tofacitinib<br>51,439 PY |                   |                 |
|                                    | <i>N</i>                       | % <sup>a</sup>    | RR <sup>b</sup> | <i>N</i>                  | % <sup>a</sup>    | RR <sup>b</sup> | <i>N</i>                     | % <sup>a</sup>    | RR <sup>b</sup> |
| Case reports                       | 12,298                         |                   |                 | 757                       |                   |                 | 13,055                       |                   |                 |
| AEs                                | 47,389                         |                   | 95.85           | 2940                      |                   | 147.00          | 50,329                       |                   | 97.84           |
| SAEs                               | 9449                           | 19.94             | 19.11           | 489                       | 16.63             | 24.45           | 9938                         | 19.75             | 19.32           |
| AESI <sup>c</sup>                  |                                |                   |                 |                           |                   |                 |                              |                   |                 |
| Serious infections                 | 1745                           | 3.68              | 3.53            | 82                        | 2.79              | 4.10            | 1827                         | 3.63              | 3.55            |
| HZ (serious and nonserious)        | 324                            | 0.68              | 0.66            | 24                        | 0.82              | 1.20            | 348                          | 0.69              | 0.68            |
| Cardiovascular events <sup>d</sup> | 212                            | 0.45              | 0.43            | 20                        | 0.68              | 1.00            | 232                          | 0.46              | 0.45            |
| Malignancies (excluding NMSC)      | 252                            | 0.53              | 0.51            | 10                        | 0.34              | 0.50            | 262                          | 0.52              | 0.51            |
| NMSC                               | 69                             | 0.15              | 0.14            | 2                         | 0.07              | 0.10            | 71                           | 0.14              | 0.14            |
| VTE <sup>e</sup>                   | 44                             | 0.09              | 0.09            | 5                         | 0.17              | 0.25            | 49                           | 0.10              | 0.10            |
| Fatal cases                        | 196                            | 1.59 <sup>f</sup> | 0.40            | 7                         | 0.92 <sup>f</sup> | 0.35            | 203                          | 1.55 <sup>f</sup> | 0.39            |

*AE* adverse event, *AESI* adverse event of special interest, *HZ* herpes zoster, *IR* immediate release, *MedDRA* Medical Dictionary for Regulatory Activities, *MR* modified release, *NMSC* nonmelanoma skin cancer, *PT* Preferred Term, *PY* patient-years, *RA* rheumatoid arthritis, *RR* reporting rate, *SAE* serious adverse event, *VTE* venous thromboembolism

<sup>a</sup>Percentages are based on total AEs by formulation except where otherwise indicated

<sup>b</sup>Events/100 PY (exposure estimated from IQVIA's Multinational Integrated Data Analysis System and Prescriber Insights databases)

<sup>c</sup>Search criteria for AESI categories are described in the Supplementary Methods

<sup>d</sup>Includes the following Standardised MedDRA Queries: central nervous system vascular disorders, myocardial infarction and associated terms, ischaemic heart disease and associated terms; and the following PTs: cardiac death, cardiac failure congestive, sudden cardiac death and pulmonary embolism

<sup>e</sup>Pulmonary embolism events are captured in the cardiovascular events and VTE categories

<sup>f</sup>Percentages based on total case reports by formulation
